# Supplementary material for: Chain length dependence of polyol synthesis of zinc ferrite nanoparticles: why is diethylene glycol so different?
Source: Royal Society of Chemistry journal article supplement (doi:10.1039/c2dt32026f), 2012-11-01
Supplement: c2dt32026f.pdf [file c2dt32026f.pdf]

Supporting Information

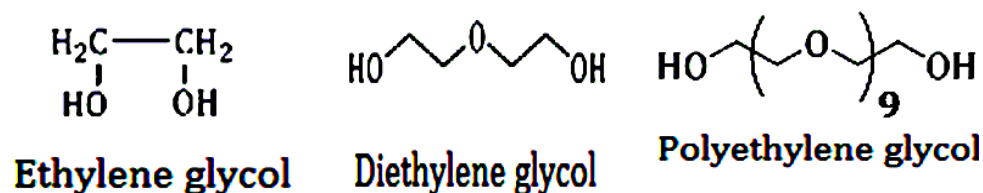

Figure S1: Structure of EG, DEG and PEG400

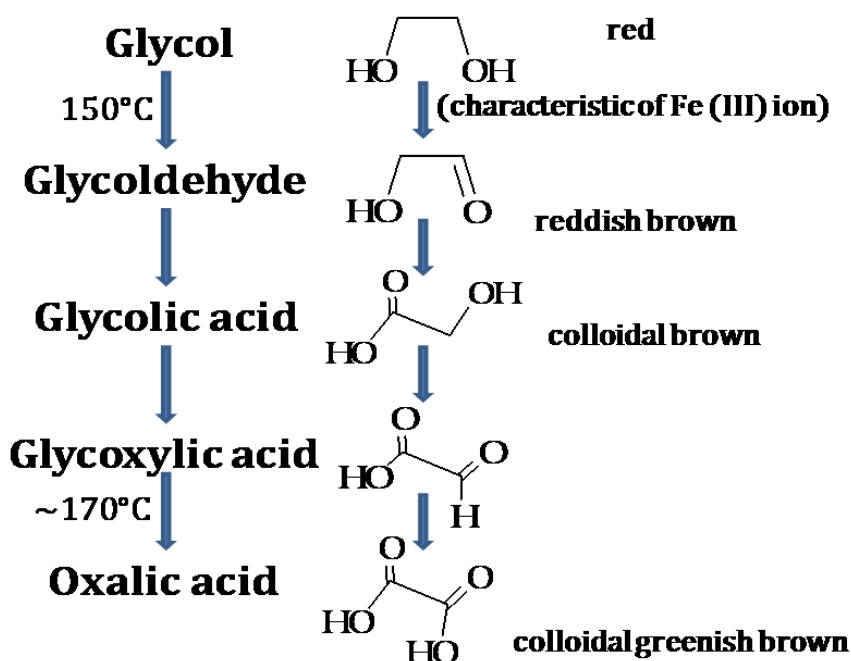

Figure S2: A general decomposition pathway of any glycol on heating.

Experimental details for spectroscopic determination of glycolaldehyde: -

1 mL of analyte was added to 5 mL of DNPH solution (0.044 g of DNPH in 57 mL of 70% perchloric acid and 32 mL of water) and 20 mL of water, boiled for 1 h, then cooled with ice. The hydrazone was then extracted with benzene (20 mL then an additional 5 mL), and the solution was made alkaline with sodium ethoxide solution (10 mL of 2.9 g of sodium ethoxide in 100 mL of ethanol). The resulting emulsion was diluted with 20 mL of ethanol

and centrifuged to increase its optical transparency, and then an absorbance spectrum was taken, as shown in Figure 4.

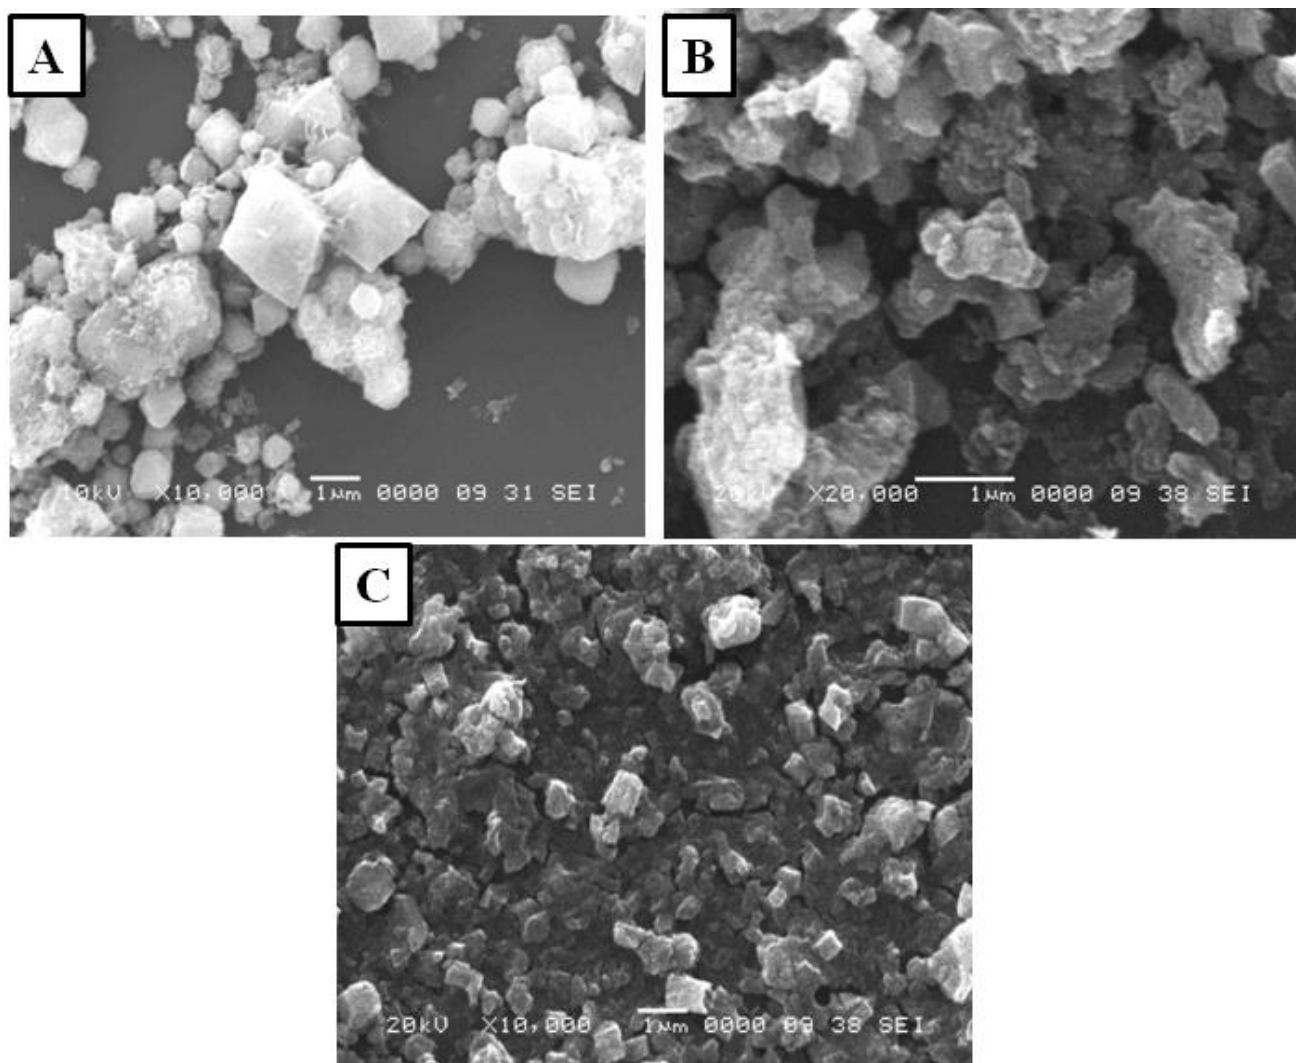

Figure S3: SEM image of A) EGylated precursor complex B) DEGylated precursor complex and C) PEGylated precursor complex.
